# Supplementary material for: Axis-dependent magnetic behavior of C60and C6010+. consequences of spherical aromatic character
Source: Royal Society of Chemistry journal article supplement (doi:10.1039/c5cc03352g), 2015-01-01
Supplement: c5cc03352g1.pdf [file c5cc03352g1.pdf]

# Axis-dependent Magnetic Behavior of $C_{60}$ and $C_{60}^{10+}$ . Consequences of Spherical Aromatic Character.

A. Muñoz-Castro

## Supporting Information.

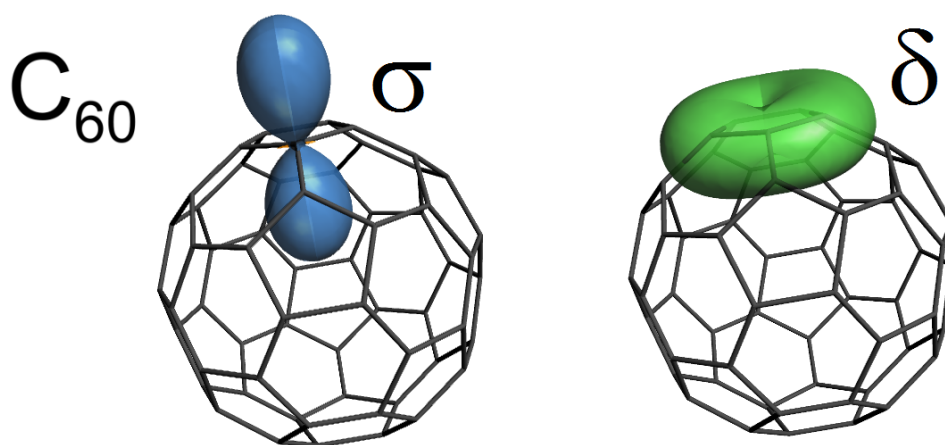

**Figure S1.** Comparison between the graphical representation of the chemical shift ( $\delta$ ) and shielding ( $\sigma$ ) tensor of calculated NMR at a representative carbon. Note, that the representation of the chemical shift involves a redefinition of the principal components (eigenvalues) in relation to an external reference, which leads to relative values neglecting a clear and straight understanding of the orientation-magnitude local response. The use of shielding ( $\sigma$ ) tensor offers a clear description of the orientation and magnitude of shielding and deshielding local response at the probe nucleus.
